# Supplementary material
Source: publisher figshare collection journal article supplement (https://diabetesjournals.figshare.com/articles/dataset/_/25355596)
Supplement: Supplementary file 2 [file 1]

# **Supplementary Materials to: Association Between Treatment Adherence and Continuous Glucose Monitoring Outcomes in People With Diabetes Using Smart Insulin Pens in a Real-World Setting**

*Thomas Danne MD, Michael Joubert MD PhD, Niels Væver Hartvig PhD, Anne Kaas MD PhD, Nikoline Nygård Knudsen MSc, and Julia K. Mader MD*

## **Table of Contents**

### **Supplementary Tables**

Supplementary Table 1— Study population characteristics in the type 1 diabetes subgroup

Supplementary Table 2— Frequency and probability of missed basal and missed bolus insulin doses in the basal-bolus group

Supplementary Table 3— Frequency and probability of missed basal and missed bolus insulin doses in the type 1 diabetes subgroup

Supplementary Table 4— Associations between insulin doses and numbers of days with data uploads over a 14-day period with glycemic outcomes in the type 1 diabetes subgroup

### **Supplementary Figures**

Supplementary Figure 1— Selection of the data analysis population.

Supplementary Figure 2— Associations between age and sex with glycemic outcomes in the basal-bolus population.

**Supplementary Table 1—Study population characteristics in the type 1 diabetes subgroup**

| Characteristic                                                  | Type 1 diabetes cohort ( <i>N</i> = 670) |
|-----------------------------------------------------------------|------------------------------------------|
| 14-day periods, <i>n</i> (n per individual)                     | 6,380 (9.5)                              |
| CGM days, <i>n</i> (n per individual)                           | 85,707 (127.9)                           |
| Days with degludec injections, <i>n</i> (n per individual)      | 77,768 (116.1)                           |
| Days with bolus insulin injections, <i>n</i> (n per individual) | 81,435 (121.5)                           |
| Age, years                                                      | 39.6 (14.9)                              |
| <b>Mobile application, <i>n</i> (%)</b>                         |                                          |
| Abbott FreeStyle LibreLink                                      | —*                                       |
| Glooko/Diasend                                                  | 325 (48.5)                               |
| Diasend                                                         | 145 (21.6)                               |
| Glooko                                                          | 200 (29.9)                               |
| <b>Sex, <i>n</i> (%)<sup>†</sup></b>                            |                                          |
| Female                                                          | 282 (46.8)                               |
| Male                                                            | 321 (53.2)                               |
| <b>Country, <i>n</i> (%)</b>                                    |                                          |
| Sweden                                                          | 335 (50.0)                               |
| UK                                                              | 103 (15.4)                               |
| Norway                                                          | 64 (9.6)                                 |
| Denmark                                                         | 39 (5.8)                                 |
| Czech Republic                                                  | 35 (5.2)                                 |
| Spain                                                           | 21 (3.1)                                 |

|                                               |             |
|-----------------------------------------------|-------------|
| Finland                                       | 20 (3.0)    |
| Japan                                         | 19 (2.8)    |
| Other‡                                        | 34 (5.1)    |
| <b>Diabetes type, <i>n</i> (%)</b>            |             |
| Unknown                                       | 0           |
| Type 1                                        | 670 (100.0) |
| Other                                         | 0           |
| <b>Bolus insulin, <i>n</i> (%)</b>            |             |
| Faster aspart                                 | 397 (59.3)  |
| Aspart                                        | 273 (40.7)  |
| <b>Basal insulin, <i>n</i> (%)</b>            |             |
| Degludec                                      | 670 (100.0) |
| <b>CGM interval, <i>n</i> (%)<sup>§</sup></b> |             |
| 900 s                                         | 276 (41.2)  |
| 300 s                                         | 392 (58.5)  |
| 600 s                                         | 2 (0.3)     |
| <b>CGM-derived metrics</b>                    |             |
| TIR, %                                        | 54.1 (19.9) |
| TAR >10.0 mmol/L, %                           | 42.5 (21.4) |
| TAR >13.9 mmol/L, %                           | 18.3 (17.4) |
| TBR <3.9 mmol/L, %                            | 3.4 (3.4)   |
| TBR <3.0 mmol/L, %                            | 0.6 (0.9)   |
| Mean glucose concentration, mmol/L            | 10.0 (2.4)  |

|                                               |             |
|-----------------------------------------------|-------------|
| %CV                                           | 32.2 (5.3)  |
| GMI score, %                                  | 7.6 (1.0)   |
| <b>Smart insulin pen data</b>                 |             |
| Upload days, <i>n</i> /14 days                | 2.1 (2.8)   |
| Missed basal insulin doses, <i>n</i> /14 days | 0.4 (0.6)   |
| Missed bolus insulin doses, <i>n</i> /14 days | 8.2 (5.4)   |
| Bolus insulin doses, <i>n</i> /day            | 4.5 (1.6)   |
| Bolus insulin doses, <i>n</i> /14 days        | 55.4 (23.5) |
| Basal insulin dose, U/day                     | 27.5 (18.4) |
| Bolus insulin dose, U/day                     | 30.1 (18.7) |

Data shown are mean (SD) values unless otherwise indicated. \*No data were recorded in the type 1 diabetes subgroup for the Abbott app. †If data were available; not all apps recorded the sex of the participants. Data were available for 603 participants (90.0%) with known type 1 diabetes. ‡Other countries were Austria, Belgium, France, Germany, the Netherlands, Poland, the Republic of Ireland, and Switzerland; if the country was missing, this was captured as 'other'. §The brand and model details for CGM devices were unknown; the interval between readings was inferred from the CGM data. %CV, coefficient of variation; aspart, insulin aspart; CGM, continuous glucose monitoring; degludec, insulin degludec; faster aspart, fast-acting insulin aspart; GMI, glucose management indicator; SD, standard deviation; TAR >10.0 mmol/L, time above range >10.0 mmol/L; TAR >13.9 mmol/L, time above range >13.9 mmol/L; TBR <3.9 mmol/L, time below range <3.9 mmol/L; TBR <3.0 mmol/L, time below range <3.0 mmol/L; TIR, time in range (3.9–10.0 mmol/L); U, units.

**Supplementary Table 2—Frequency and probability of missed basal and missed bolus insulin doses in the basal-bolus group**

| Response                  | Frequency of occurrence over a 14-day period, <i>n</i> | Estimated probability of at least one occurrence over a 14-day period, % |
|---------------------------|--------------------------------------------------------|--------------------------------------------------------------------------|
| Missed basal insulin dose | 0.19 (0.18, 0.21)                                      | 17.6 (16.5, 18.7)                                                        |
| Missed bolus insulin dose | 6.0 (5.9, 6.1)                                         | 99.1 (98.7, 99.4)                                                        |

Data are shown as mean (95% CI).

**Supplementary Table 3—Frequency and probability of missed basal and missed bolus insulin doses in the type 1 diabetes subgroup**

| <b>Response</b>           | <b>Frequency of occurrence over a 14-day period, <i>n</i></b> | <b>Estimated probability of at least one occurrence over a 14-day period, %</b> |
|---------------------------|---------------------------------------------------------------|---------------------------------------------------------------------------------|
| Missed basal insulin dose | 0.18 (0.16, 0.20)                                             | 16.5 (14.4, 18.9)                                                               |
| Missed bolus insulin dose | 6.6 (6.2, 7.0)                                                | 98.4 (97.7, 98.9)                                                               |

Data are shown as mean (95% CI).

**Supplementary Table 4—Associations between insulin doses and numbers of days with data uploads over a 14-day period with glycemic outcomes in the type 1 diabetes subgroup**

| Response                      | Missed basal dose    | Missed bolus dose    | Daily bolus injection | Days with data uploads |
|-------------------------------|----------------------|----------------------|-----------------------|------------------------|
| <b>TIR, %</b>                 |                      |                      |                       |                        |
| Slope (95% CI)                | −4.35 (−6.52, −2.18) | −1.48 (−1.72, −1.24) | 3.08 (2.29, 3.86)     | 0.78 (0.36, 1.21)      |
| <i>P</i> value                | 0.0001               | < 0.0001             | < 0.0001              | 0.0004                 |
| <b>TAR &gt;10.0 mmol/L, %</b> |                      |                      |                       |                        |
| Slope (95% CI)                | 4.35 (1.99, 6.70)    | 1.63 (1.37, 1.90)    | −3.16 (−4.01, −2.30)  | −0.76 (−1.23, −0.30)   |
| <i>P</i> value                | 0.0004               | < 0.0001             | < 0.0001              | 0.0013                 |
| <b>TAR &gt;13.9 mmol/L, %</b> |                      |                      |                       |                        |
| Slope (95% CI)                | 5.02 (3.14, 6.89)    | 1.25 (1.04, 1.45)    | −2.71 (−3.39, −2.03)  | −0.49 (−0.86, −0.13)   |
| <i>P</i> value                | < 0.0001             | < 0.0001             | < 0.0001              | 0.0091                 |
| <b>TBR &lt;3.9 mmol/L, %</b>  |                      |                      |                       |                        |
| Slope (95% CI)                | 0.02 (−0.46, 0.49)   | −0.16 (−0.21, −0.10) | 0.07 (−0.10, 0.24)    | −0.01 (−0.10, 0.08)    |
| <i>P</i> value                | 0.9480               | < 0.0001             | 0.4114                | 0.7971                 |

|                                           |                    |                     |                      |                      |
|-------------------------------------------|--------------------|---------------------|----------------------|----------------------|
| <b>TBR &lt;3.0 mmol/L, %</b>              |                    |                     |                      |                      |
| Slope (95% CI)                            | 0.07 (−0.06, 0.20) | −0.01 (−0.03, 0.00) | 0.03 (−0.02, 0.07)   | −0.01 (−0.03, 0.02)  |
| <i>P</i> value                            | 0.2680             | 0.0733              | 0.2738               | 0.5198               |
| <b>Mean glucose concentration, mmol/L</b> |                    |                     |                      |                      |
| Slope (95% CI)                            | 0.66 (0.40, 0.92)  | 0.18 (0.15, 0.21)   | −0.36 (−0.46, −0.27) | −0.07 (−0.12, −0.02) |
| <i>P</i> value                            | < 0.0001           | < 0.0001            | < 0.0001             | 0.0079               |
| <b>GMI score, %</b>                       |                    |                     |                      |                      |
| Slope (95% CI)                            | 0.28 (0.17, 0.40)  | 0.08 (0.06, 0.09)   | −0.16 (−0.20, −0.12) | −0.03 (−0.05, −0.01) |
| <i>P</i> value                            | < 0.0001           | < 0.0001            | < 0.0001             | 0.0079               |
| <b>%CV</b>                                |                    |                     |                      |                      |
| Slope (95% CI)                            | 0.19 (−0.51, 0.88) | 0.22 (0.14, 0.29)   | −0.04 (−0.29, 0.21)  | −0.16 (−0.30, −0.02) |
| <i>P</i> value                            | 0.5976             | < 0.0001            | 0.7438               | 0.0217               |



Between-individual effects ( $N = 670$ ). The presented data include estimated regression coefficients (slope) with 95% CI. Headers show individual-level parameters, calculated as averages over the 14-day blocks for each individual. The regression coefficient shows that, for example, if you compare two individuals with equal characteristics, except one has on average one more missed basal insulin dose per 14-days, then this individual would have a mean decrease in TIR of  $-4.35\%$ . %CV, coefficient of variation; GMI, glucose management indicator; TAR  $>10.0$  mmol/L, time above range  $>10.0$  mmol/L; TAR  $>13.9$  mmol/L, time above range  $>13.9$  mmol/L; TBR  $<3.9$  mmol/L, time below range  $<3.9$  mmol/L; TBR  $<3.0$  mmol/L, time below range  $<3.0$  mmol/L; TIR, time in range (3.9–10.0 mmol/L).

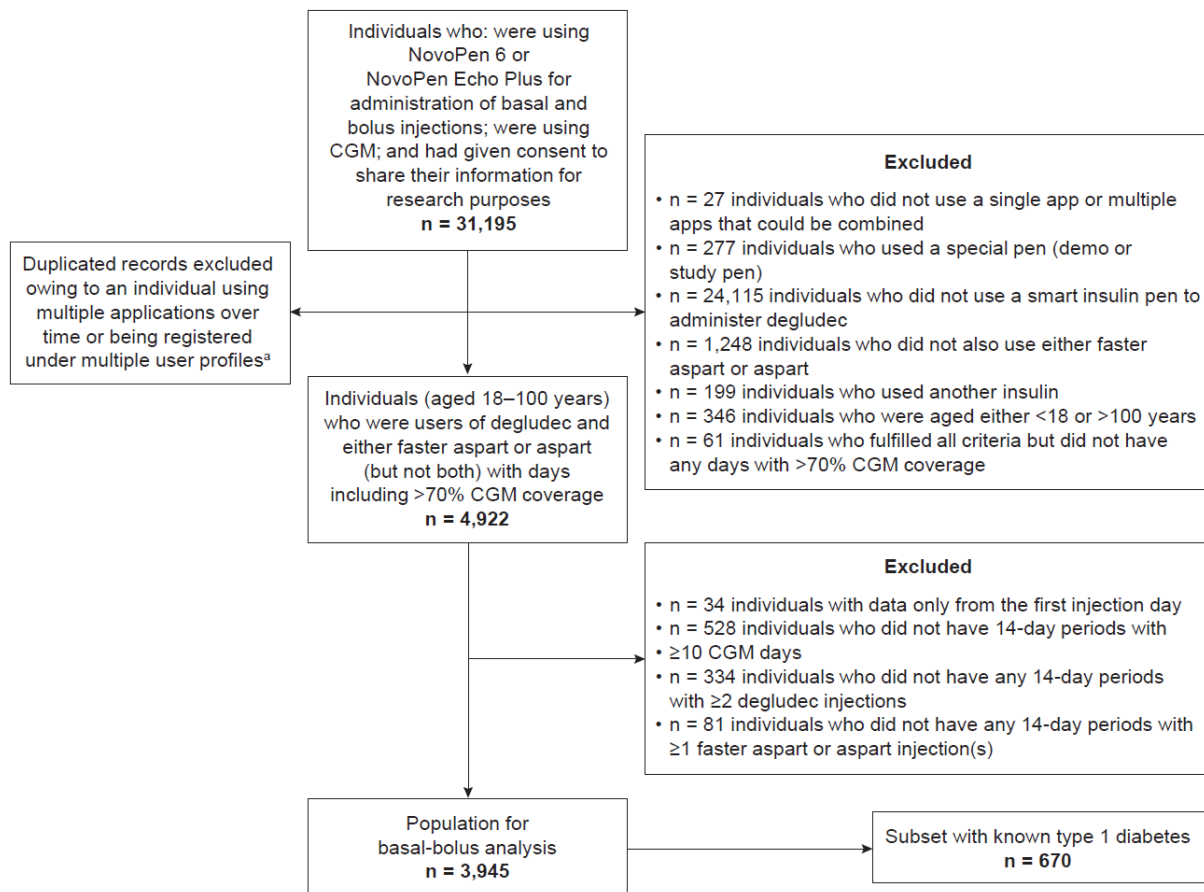

**Supplementary Figure 1—Selection of the data analysis population.** \*If multiple user IDs had data from the same smart insulin pen, identified by a unique serial number, it was assumed that these user IDs belonged to the same person and were considered equivalent. Data from equivalent user IDs were combined into one coherent data set. Aspart, insulin aspart; CGM, continuous glucose monitoring; faster aspart, fast-acting insulin aspart; ID, identifier.

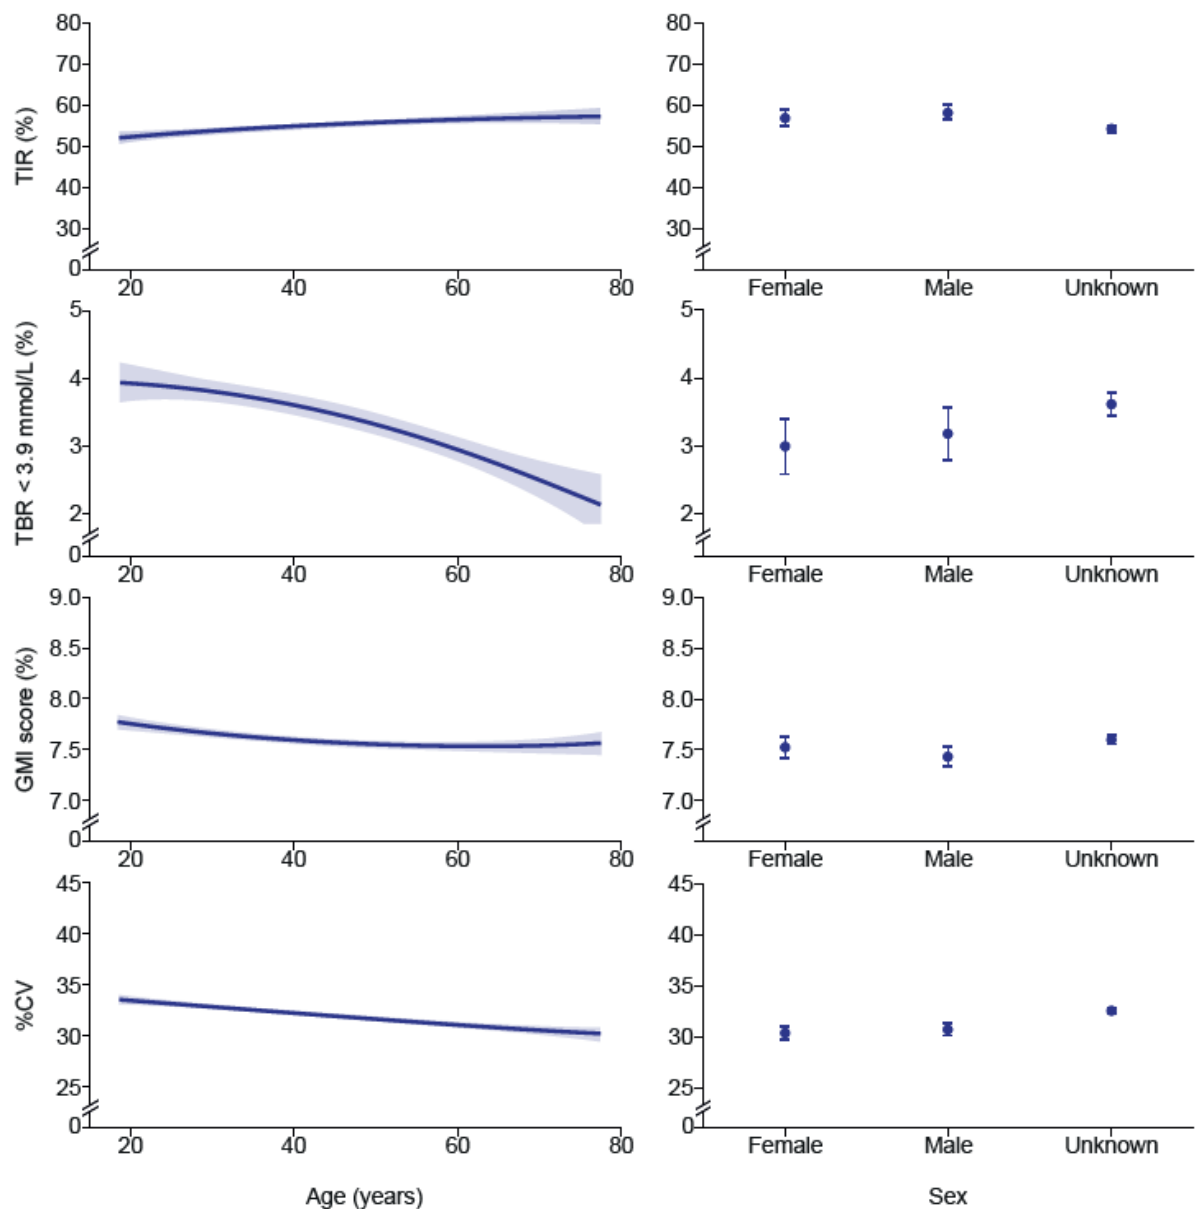

**Supplementary Figure 2**—Associations between age and sex with glycemic outcomes in the basal-bolus population. Between-individual effects ( $N = 3,945$ ). %CV, coefficient of variation; GMI, glucose management indicator; TBR <3.9 mmol/L, time below range <3.9 mmol/L; TIR, time in range (3.9–10.0 mmol/L).
